# Supplementary material for: Efficient Isolation of Lymphocytes and Myogenic Cells from the Tissue of Muscle Regeneration
Source: MDPI journal article supplement (doi:10.3390/cells11111754), 2022-05-26
Supplement: s1 [file s1]

## Supplemental Figure S1

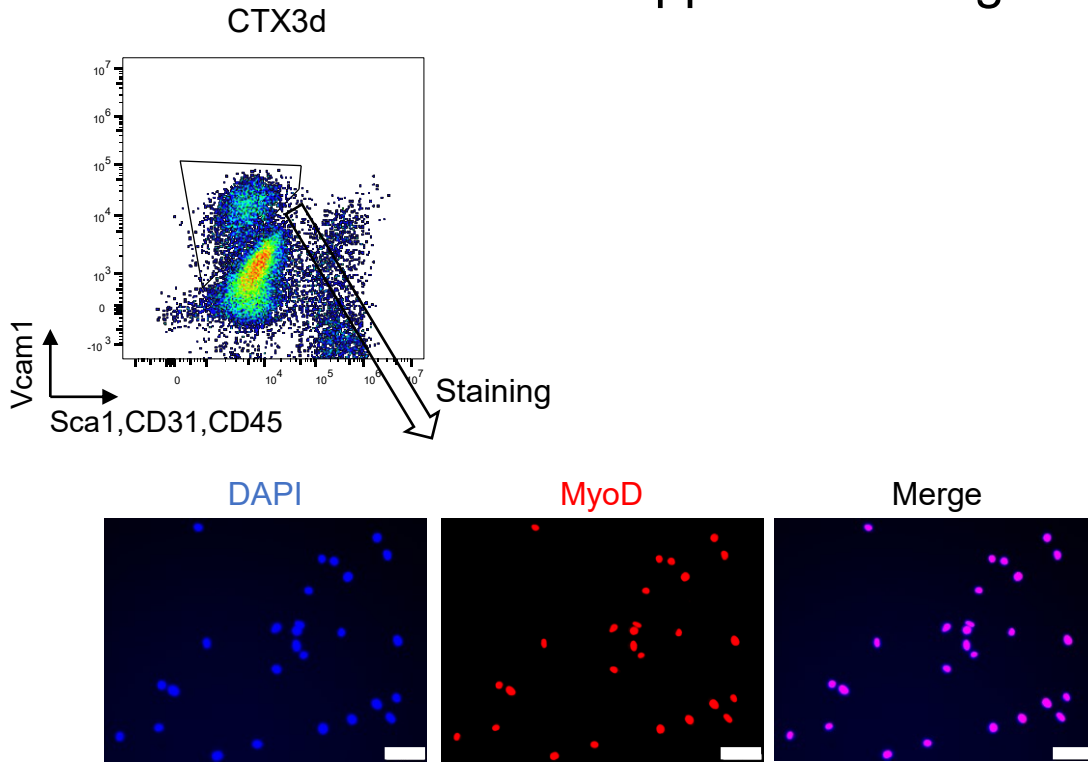

Figure S1. Immunostaining for myogenic markers in sorted cells. Muscle from wild-type mice on day 3 of muscle injury was enzymatically treated by collagenase treatment. Vcam1<sup>+</sup>Sca1<sup>-</sup>CD31<sup>-</sup>CD45<sup>-</sup> cells were sorted by FACS and stained with a MyoD (red) antibody. Scale bar, 50  $\mu$ m.
